# Supplementary material for: Fine tuning of the unfolded protein response by ISRIB improves neuronal survival in a model of amyotrophic lateral sclerosis
Source: PubMed Central journal article supplement (PMC7250913; doi:10.1038/s41419-020-2601-2), 2020-05-26

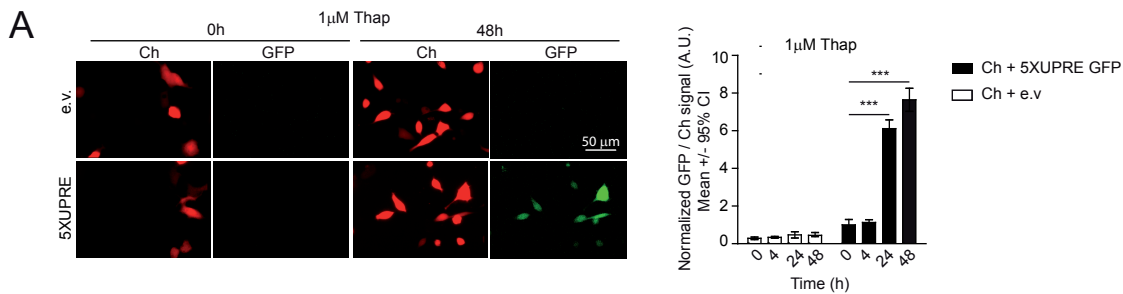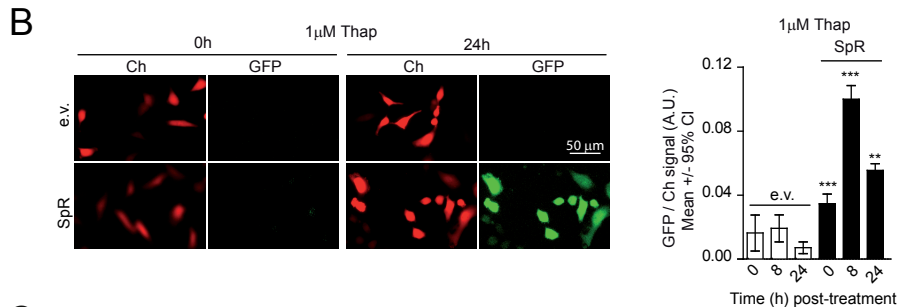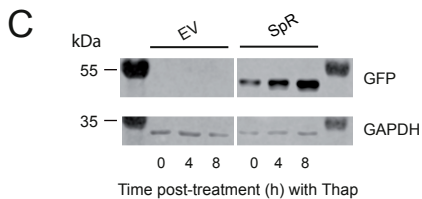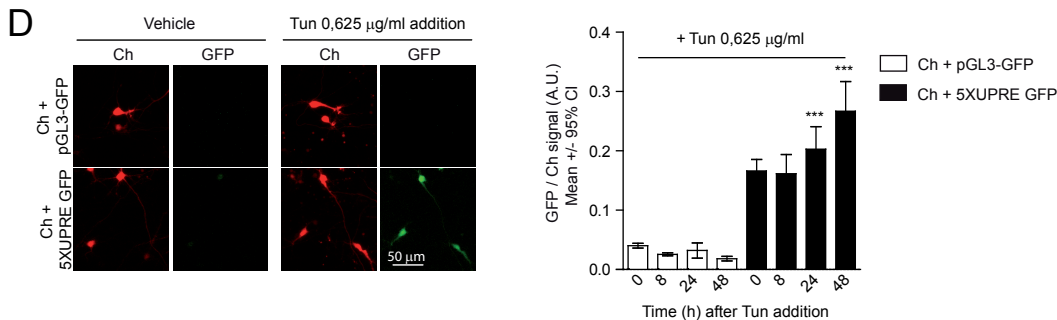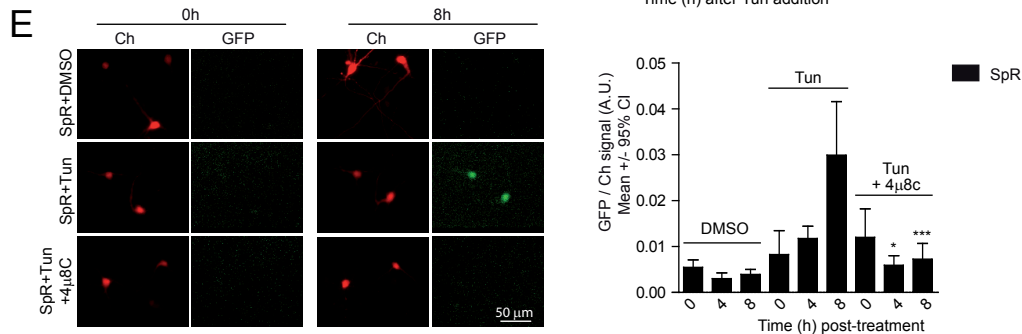

Supplement: 41419_2020_2601_MOESM4_ESM.pdf [file 41419_2020_2601_MOESM4_ESM.pdf]
