# Supplementary material for: Fine tuning of the unfolded protein response by ISRIB improves neuronal survival in a model of amyotrophic lateral sclerosis
Source: PubMed Central journal article supplement (PMC7250913; doi:10.1038/s41419-020-2601-2), 2020-05-26

**A**

ATF4/Tubulin  
Normalized values against DMSO 3 h

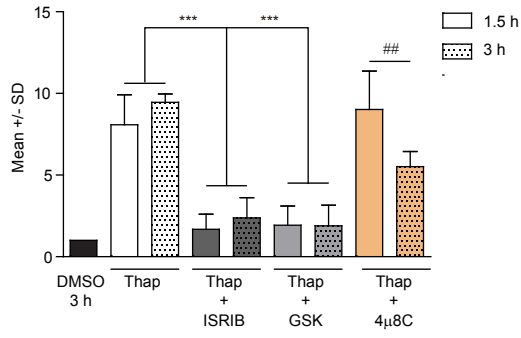**B**

XBP1s/Tubulin  
Normalized values against DMSO 3 h

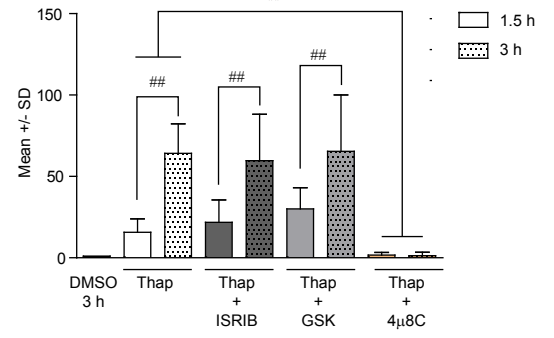

Supplement: 41419_2020_2601_MOESM6_ESM.pdf [file 41419_2020_2601_MOESM6_ESM.pdf]
