# Supplementary material for: Fine tuning of the unfolded protein response by ISRIB improves neuronal survival in a model of amyotrophic lateral sclerosis
Source: PubMed Central journal article supplement (PMC7250913; doi:10.1038/s41419-020-2601-2), 2020-05-26

A

| Compound   | Molecular Target            | Improves Survival | Response to ER stress<br>Neurons / HEK293 |     |                   |    |
|------------|-----------------------------|-------------------|-------------------------------------------|-----|-------------------|----|
|            |                             |                   | ATF4 Translation                          |     | Protein Synthesis |    |
| ISRIB      | eIF2B dimerization enhancer | Yes               | ↓                                         | ↓↓↓ | ↑↑                | ↑↑ |
| GSK2606414 | PERK kinase domain          | No                | ↓↓↓                                       | ↓↓↓ | ↑↑                | ↑↑ |
| 4 $\mu$ 8C | IRE1 $\alpha$ RNase domain  | No                | NT                                        | NT  | NT                | NT |

B

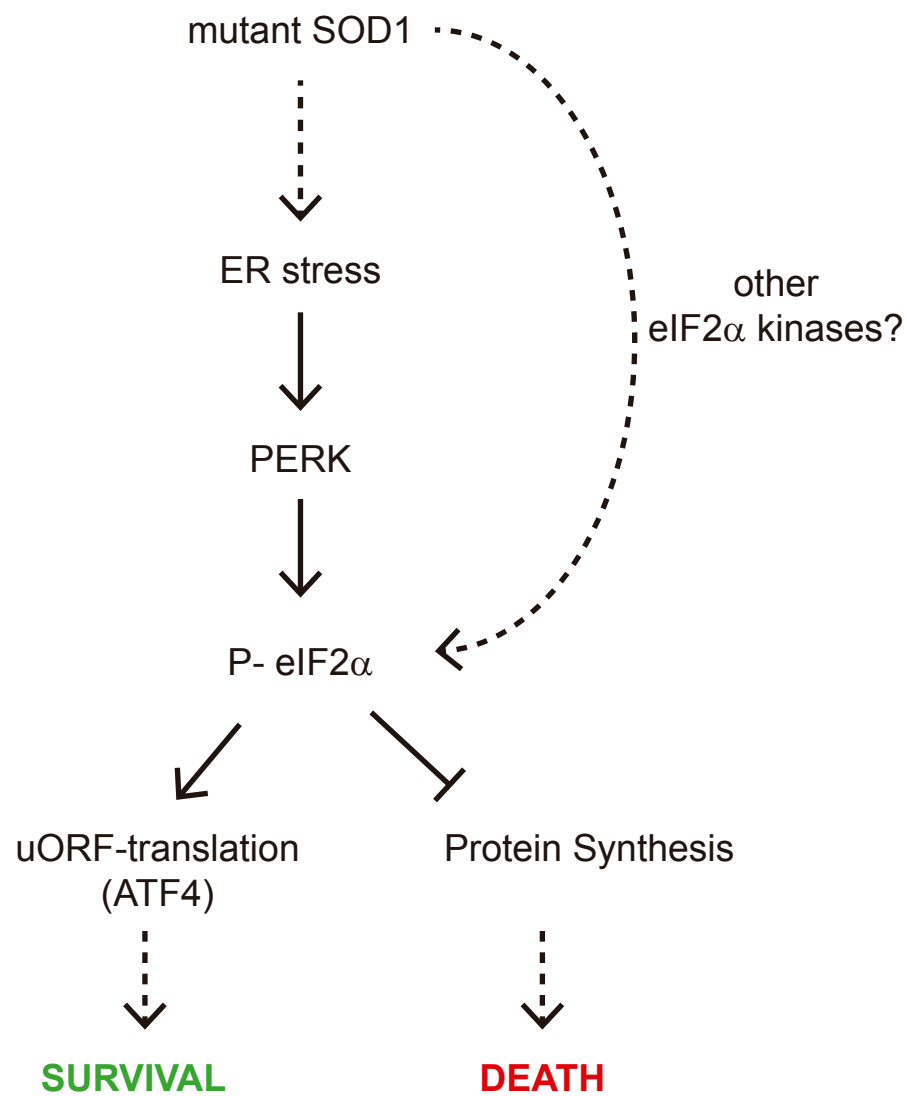

C

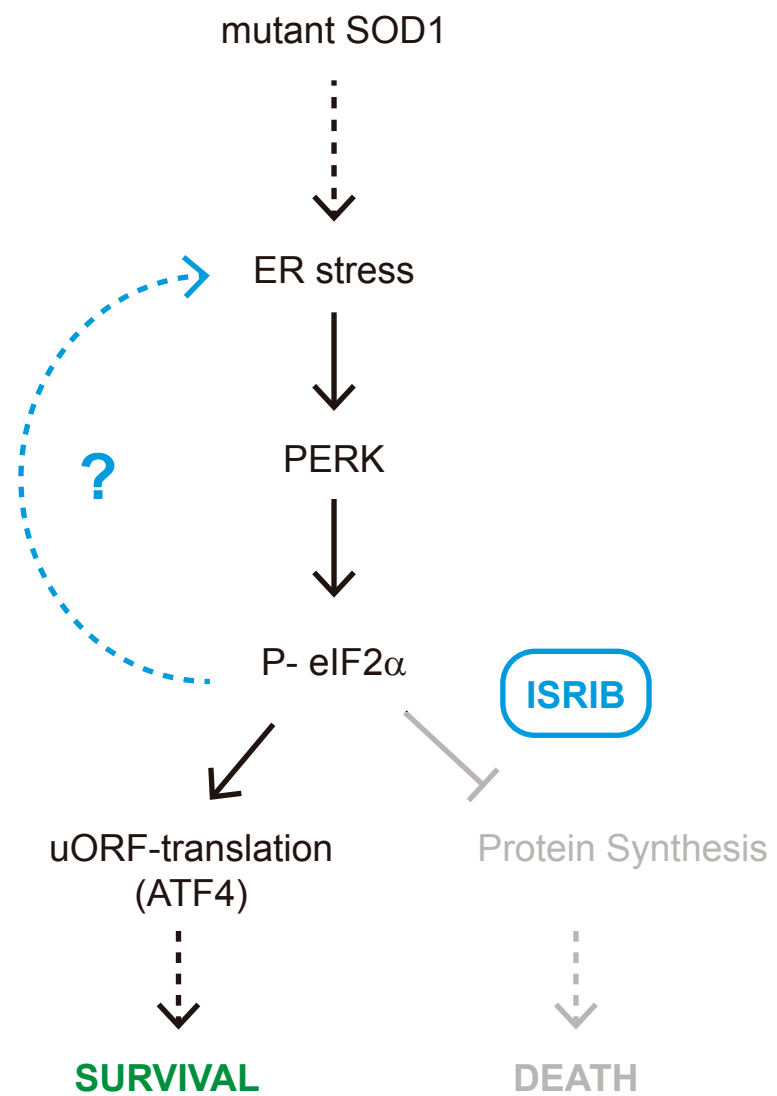

Supplement: 41419_2020_2601_MOESM8_ESM.pdf [file 41419_2020_2601_MOESM8_ESM.pdf]
